# Supplementary material
Source: Springer Nature journal article supplement (https://www.springermedizin.de/resource/supplementary/12933_2008_131_MOESM3_ESM.pdf/9539664)

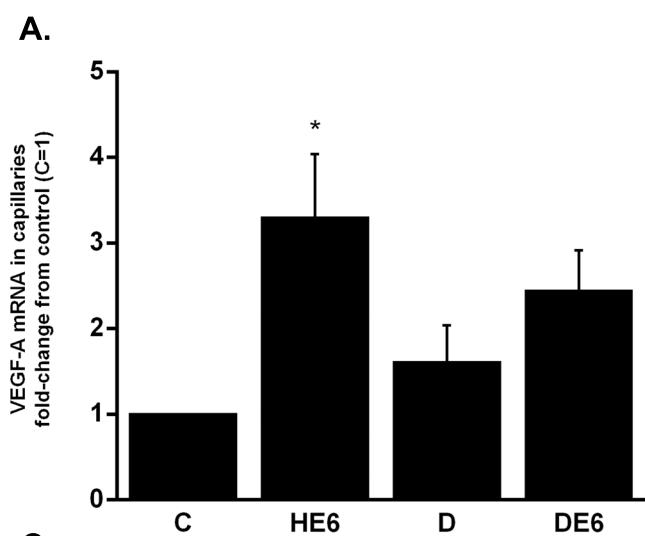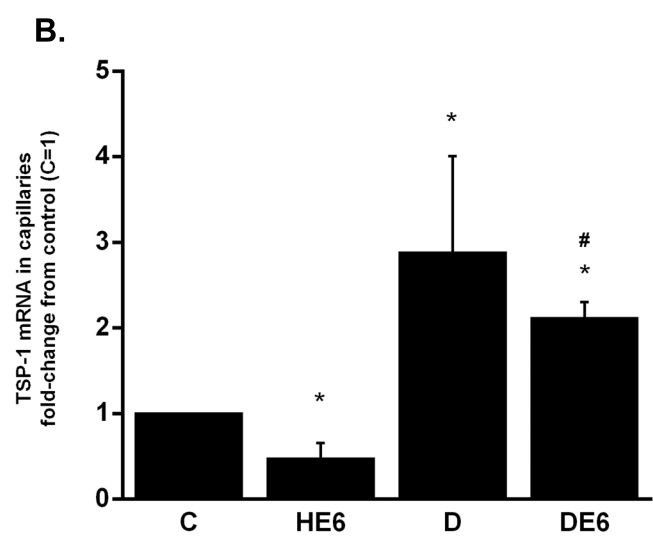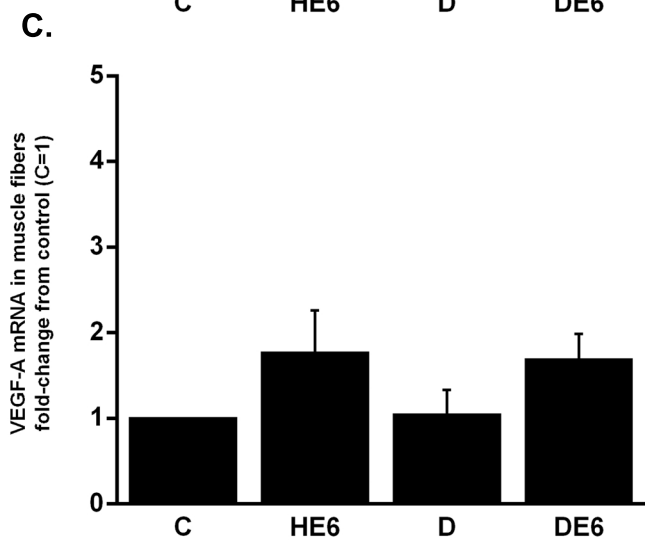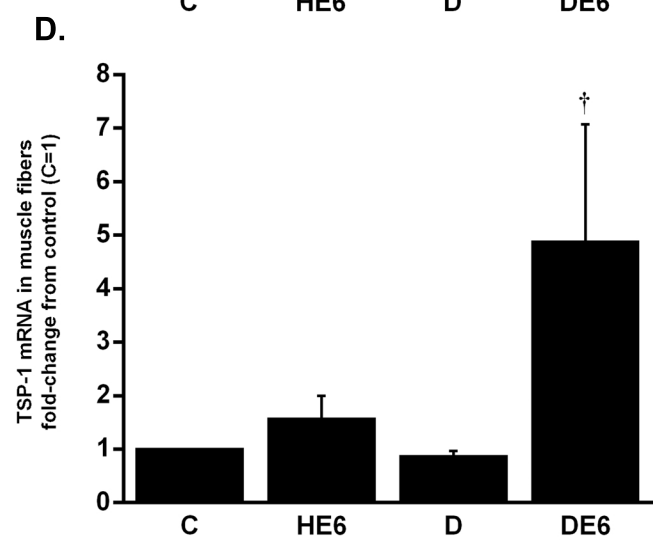

Supplement: MOESM3 [file 9539664]
